# Supplementary material
Source: publisher figshare collection journal article supplement (https://acs.figshare.com/ndownloader/files/12467987)
Supplement: Supplementary file 1 [file 12467987]

# Ice-Liquid Oscillations in Nanoconfined Water

Noah Kastelowitz and Valeria Molinero\*

Department of Chemistry, The University of Utah, 315 South 1400 East, Salt Lake City, Utah 84112-0850

\*Corresponding author, e-mail: [Valeria.Molinero@utah.edu](mailto:Valeria.Molinero@utah.edu)

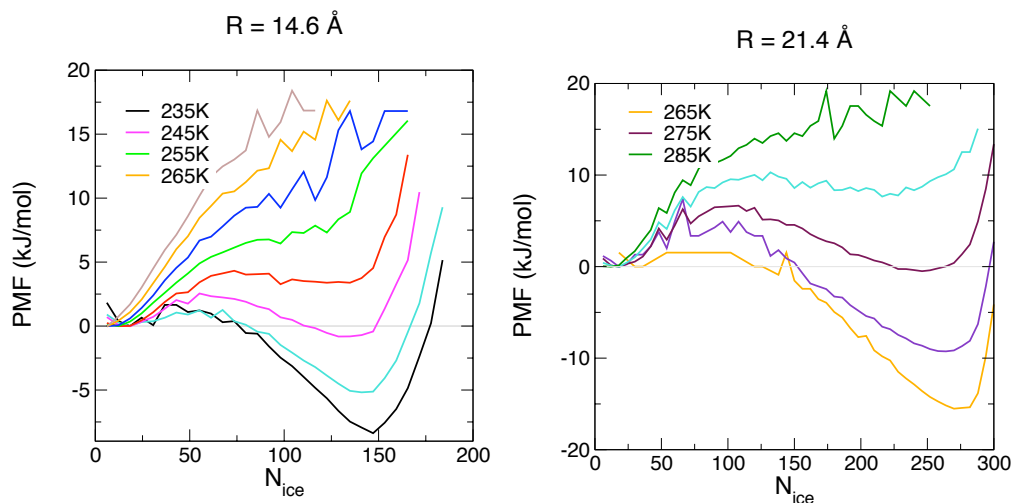

## Supporting Figure 1.

Free energy profiles (a.k.a. potentials of mean force) as a function of the number of BH ice molecules between confining disks of radii 14.6 Å (left) and 21.4 Å (right) in equilibrium with a water bath at the indicated temperatures and 1 bar.

## Caption of Supporting Movie 1.

The movie shows the ice-liquid oscillations in the water bilayer confined by 7.2 nm disks in equilibrium with a water bath at 1 bar and 278.75 K (the equivalence temperature of this confined bilayer) along a 800 ns long simulation trajectory. For clarity, only the water molecules in the 0.85 nm slice of the system corresponding to the width of the confined system is shown: red indicates that the water is confined between the disks (which are hidden), blue that it belongs to the bath, with which it exchanges freely.
